- measured on an 11-point numerical pain rating scale. *Pain* 2001; 94:149-58
36. Kong J, White NS, Kwong KK, Vangel MG, Rosman IS, Gracely RH, Gollub RL: Using fMRI to dissociate sensory encoding from cognitive evaluation of heat pain intensity. *Hum Brain Mapp* 2006; 27:715-21
  37. Corbetta M, Shulman GL: Control of goal-directed and stimulus-driven attention in the brain. *Nat Rev Neurosci* 2002; 3:201-15
  38. Napadow V, LaCount L, Park K, As-Sanie S, Clauw DJ, Harris RE: Intrinsic brain connectivity in fibromyalgia is associated with chronic pain intensity. *Arthritis Rheum* 2010; 62:2545-55
  39. Baliki MN, Chialvo DR, Geiha PY, Levy RM, Harden RN, Parrish TB, Apkarian AV: Chronic pain and the emotional brain: Specific brain activity associated with spontaneous fluctuations of intensity of chronic back pain. *J Neurosci* 2006; 26:12165-73
  40. Kobayashi Y, Kurata J, Sekiguchi M, Kokubun M, Akai-shizawa T, Chiba Y, Konno S, Kikuchi S: Augmented cerebral activation by lumbar mechanical stimulus in chronic low back pain patients: An fMRI study. *Spine* 2009; 34:2431-6
  41. Chizh BA, Greenspan JD, Casey KL, Nemenov MI, Treede RD: Identifying biological markers of activity in human nociceptive pathways to facilitate analgesic drug development. *Pain* 2008; 140:249-53
  42. Stephenson DT, Arneric SP: Neuroimaging of pain: Advances and future prospects. *J Pain* 2008; 9:567-79
  43. Shariat SF, Lotan Y, Vickers A, Karakiewicz PI, Schmitz-Dräger BJ, Goebell PJ, Malats N: Statistical consideration for clinical biomarker research in bladder cancer. *Urol Oncol* 2010; 28:389-400
  44. Bensalah K, Montorsi F, Shariat SF: Challenges of cancer biomarker profiling. *Eur Urol* 2007; 52:1601-9

## ANESTHESIOLOGY REFLECTIONS

### An Airway Pastel by Chevalier Jackson

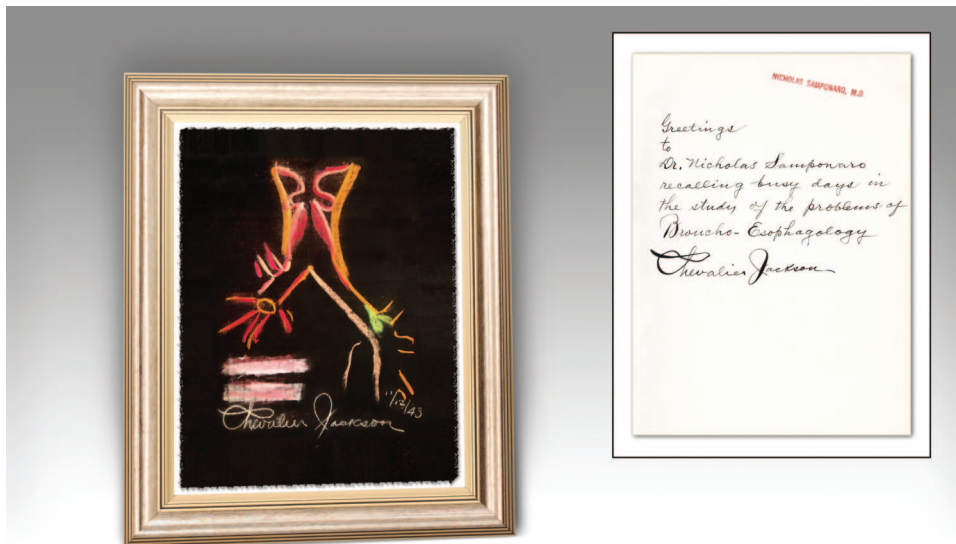

Although anesthesiologists remember Chevalier Jackson, M.D. (1865–1958), for developing his namesake laryngoscope, most other physicians hail him as a pioneer in bronchoscopy. During World War II, Jackson left clinical retirement to teach his “Postgraduate Course” at Philadelphia’s Temple University to surgeons, including a musically talented one surnamed Samponaro. With a chalk stick in each hand on November 12, 1943, Jackson drew simultaneously the branches of the left and right bronchi (*above*). He personalized this pastel with: “Greetings to Nicholas Samponaro, recalling busy days in the study of the problems of Broncho-Esophagology. Chevalier Jackson.” Fortunately for their patients, both Drs. Jackson and Samponaro were ambidextrous! (Copyright © the American Society of Anesthesiologists, Inc. This image also appears in the *Anesthesiology Reflections* online collection available at [www.anesthesiology.org](http://www.anesthesiology.org).)

George S. Bause, M.D., M.P.H., Honorary Curator, ASA’s Wood Library-Museum of Anesthesiology, Park Ridge, Illinois, and Clinical Associate Professor, Case Western Reserve University, Cleveland, Ohio. [UJYC@aol.com](mailto:UJYC@aol.com).
